# Supplementary material
Source: PubMed Central journal article supplement (PMC3343727)

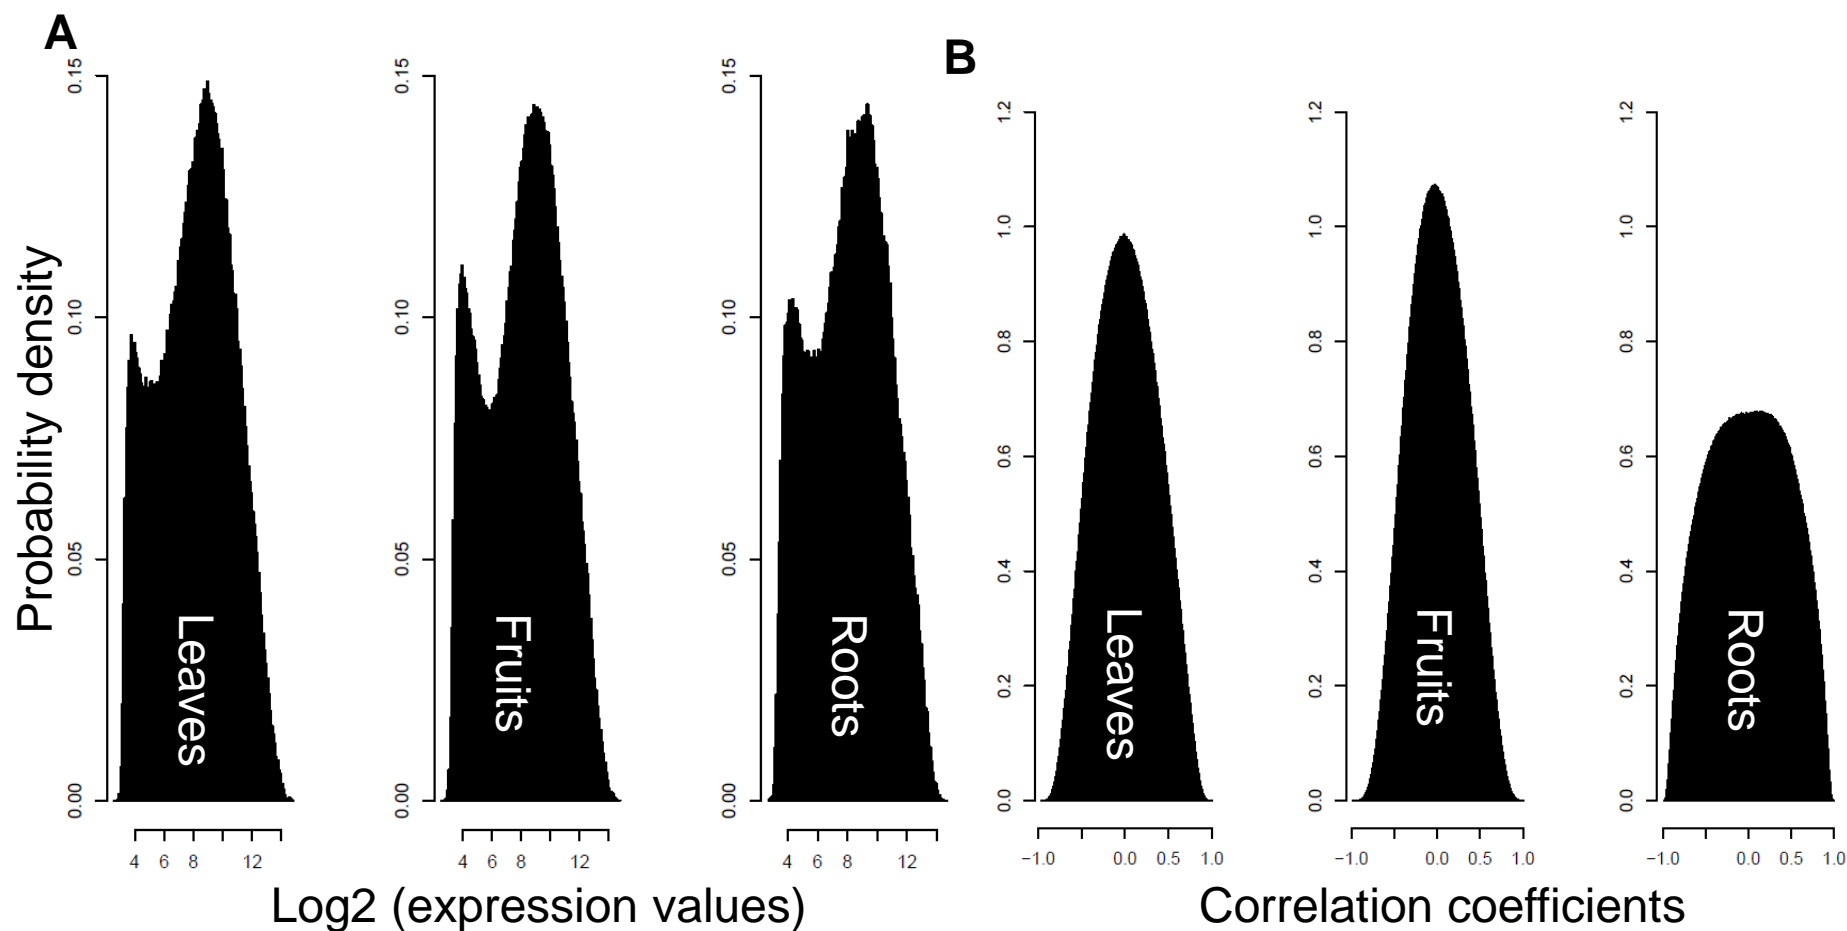

**Supplemental Figure S1:** The distribution of the expression matrix (A) and correlation coefficients (B) for the 3 organs are based on 9k genes calculated using the RMA algorithm.

MapMan functional categories

photosynthesis  
light reaction  
major CHO metabolism  
minor CHO metabolism  
Glucoseoneogenesis  
glycolysis  
fermentation  
xylose cycle  
TCA / org. transformation  
Mitochondrial electron transport / ATP synthesis

Correlation Matrix of all dataset

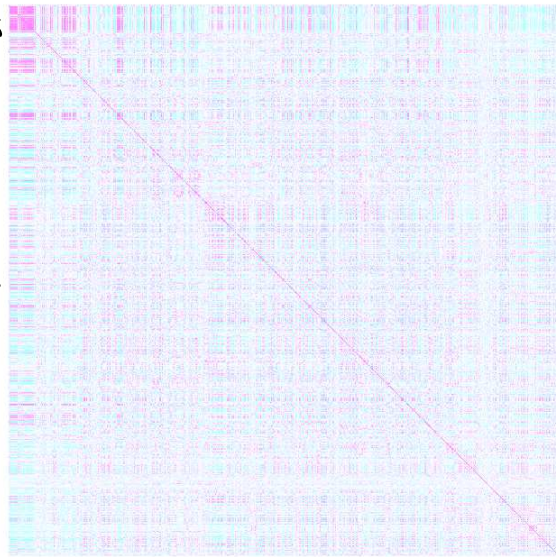

Correlation Matrix of leaves

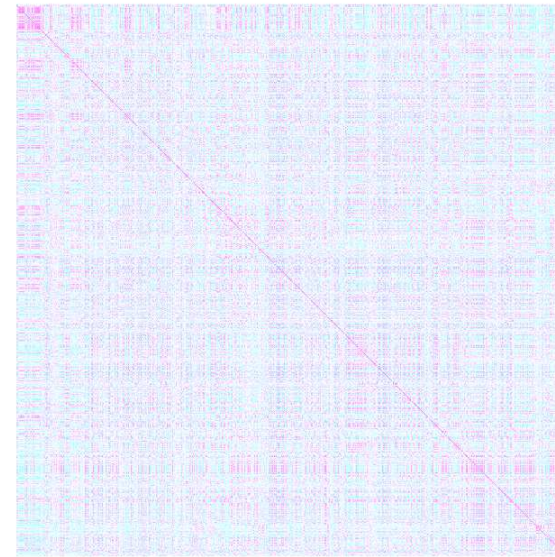

Correlation Matrix of fruits

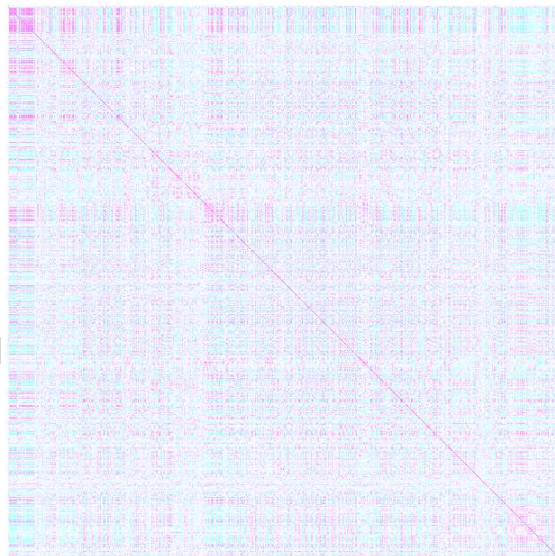

Correlation Matrix of roots

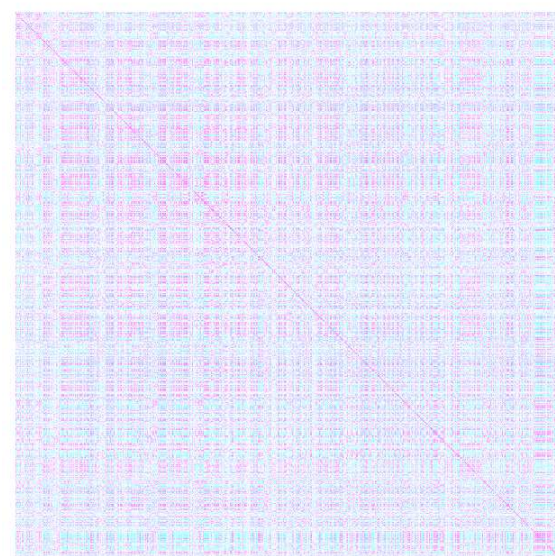

**Supplemental Figure S2:**  
Correlation heatmaps for 4 datasets, "all data", "leaves", "fruits", and "roots". The values represent Pearson's correlation coefficients.

**Supplemental Figure S3:** Correlation of expression values measured by quantitative real-time PCR (qRT-PCR) and microarray.  $r$ , Pearson's correlation coefficient.

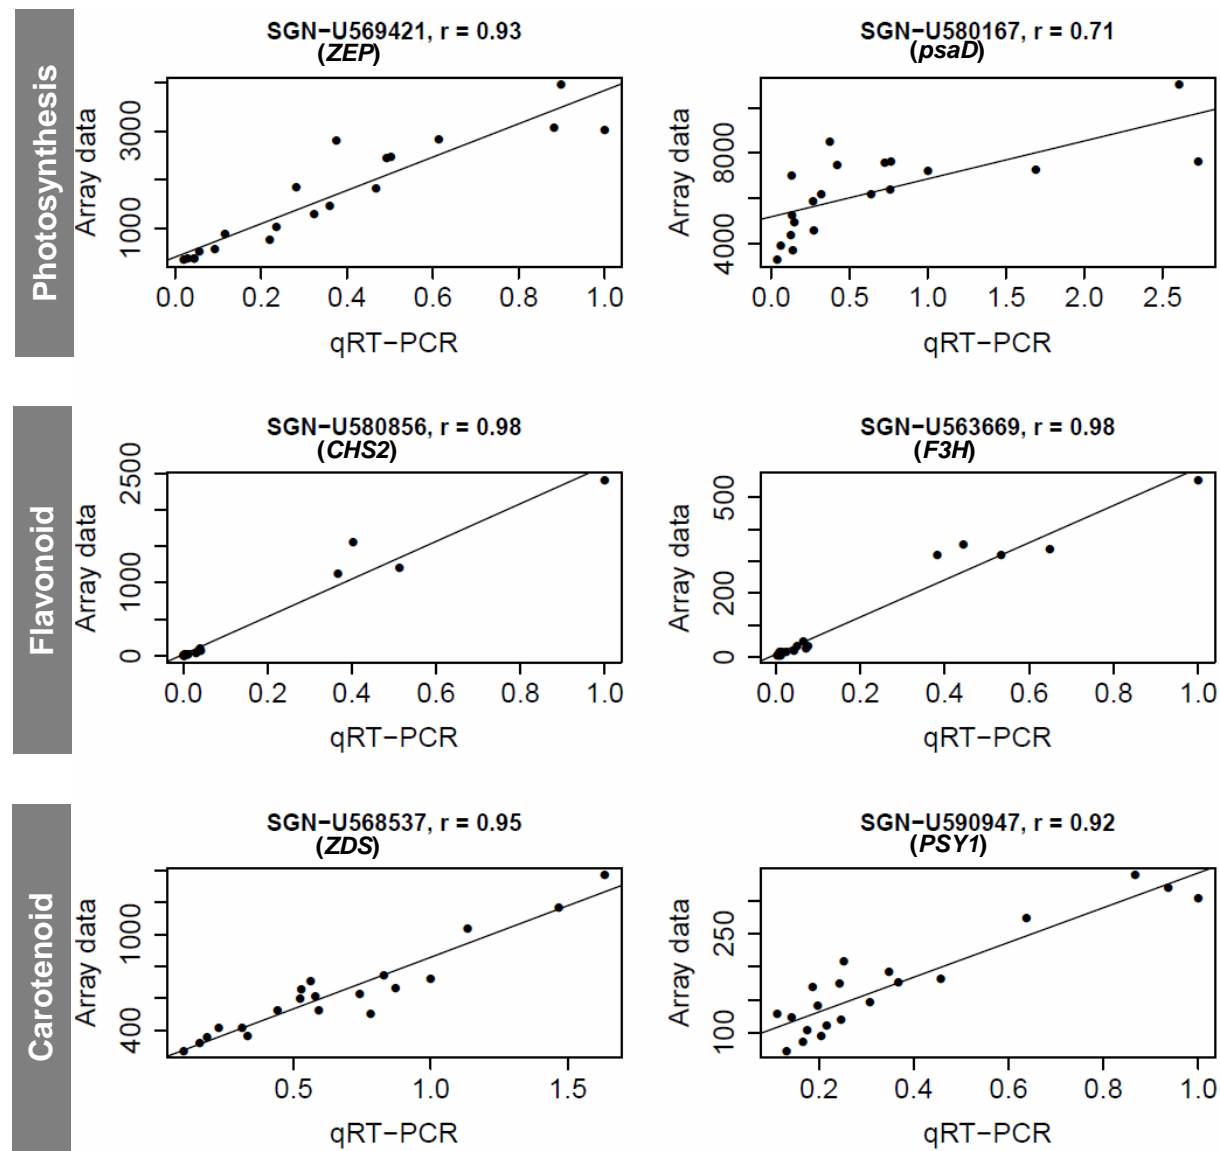

Supplement: supp_pp.111.188367_188367revtomato_SupplFigures.pdf [file supp_pp.111.188367_188367revtomato_SupplFigures.pdf]
